# Supplementary material
Source: HighWire-hosted journal article supplement (https://erj.ersjournals.com/content/55/1/1901147)
Supplement: inline-supplementary-material-1 [file inline-supplementary-material-1.pdf]

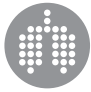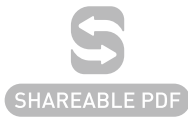

# Oral steroid-sparing effect of high-dose inhaled corticosteroids in asthma

Ingrid Majjers<sup>1</sup>, Nethmi Kearns <sup>1</sup>, James Harper <sup>1</sup>, Mark Weatherall<sup>2</sup> and Richard Beasley <sup>1,3</sup>

**Affiliations:** <sup>1</sup>Medical Research Institute of New Zealand, Wellington, New Zealand. <sup>2</sup>Dept of Medicine, University of Otago Wellington, Wellington, New Zealand. <sup>3</sup>School of Biological Sciences, Victoria University of Wellington, Wellington, New Zealand.

**Correspondence:** Richard Beasley, Medical Research Institute of New Zealand, Private Bag 7902, Newtown, Wellington 6242, New Zealand. E-mail: richard.beasley@mri.nz.ac.nz

@ERSpublications

**In oral corticosteroid-dependent asthma, the majority of the oral corticosteroid-sparing effects of high-dose inhaled corticosteroids (ICS) are due to their systemic effects. Clinicians should be aware of this bioequivalence when prescribing high-dose ICS.** <http://bit.ly/2m0Fa8m>

**Cite this article as:** Majjers I, Kearns N, Harper J, *et al.* Oral steroid-sparing effect of high-dose inhaled corticosteroids in asthma. *Eur Respir J* 2020; 55: 1901147 [<https://doi.org/10.1183/13993003.01147-2019>].

This single-page version can be shared freely online.

## ABSTRACT

**Background:** The proportion of the efficacy of high-dose inhaled corticosteroids (ICS) in oral corticosteroid-dependent asthma that is due to systemic effects is uncertain. This study aimed to estimate the ICS dose–response relationship for oral corticosteroid-sparing effects in oral corticosteroid-dependent asthma, and to determine the proportion of oral corticosteroid-sparing effects due to their systemic effects, based on the comparative dose–response relationship of ICS *versus* oral corticosteroids on adrenal suppression.

**Methods:** Systematic review and meta-analysis of randomised controlled trials reporting oral corticosteroid-sparing effects of high-dose ICS in oral corticosteroid-dependent asthma. In addition, reports of oral corticosteroid to ICS dose-equivalence in terms of adrenal suppression were retrieved. The primary outcome was the proportion of the oral corticosteroid-sparing effect of ICS that could be attributed to systemic absorption, per 1000 µg increase of ICS, expressed as a ratio. This ratio estimates the oral corticosteroid sparing effect of ICS due to systemic effects.

**Results:** 11 studies including 1283 participants reporting oral corticosteroid-sparing effects of ICS were identified. The prednisone dose decrease per 1000 µg increase in ICS varied from 2.1 mg to 4.9 mg, depending on the type of ICS. The ratio of the prednisone-sparing effect due to the systemic effects per 1000 µg of fluticasone propionate was 1.02 (95% CI 0.68–2.08) and for budesonide was 0.93 (95% CI 0.63–1.89).

**Conclusion:** In patients with oral corticosteroid-dependent asthma, the limited available evidence suggests that the majority of the oral corticosteroid-sparing effect of high-dose ICS is likely to be due to systemic effects.
